# Supplementary material
Source: PubMed Central journal article supplement (PMC11104516)
Supplement: NIHMS1990703-supplement-Supplemental_Material.pdf [file NIHMS1990703-supplement-Supplemental_Material.pdf]

Supplementary Materials for

**Antigen-specific memory NK cell responses against HIV and influenza  
utilize the NKG2/HLA-E axis**

Stephanie Jost *et al.*

Corresponding author: R. Keith Reeves, [keith.reeves@duke.edu](mailto:keith.reeves@duke.edu)

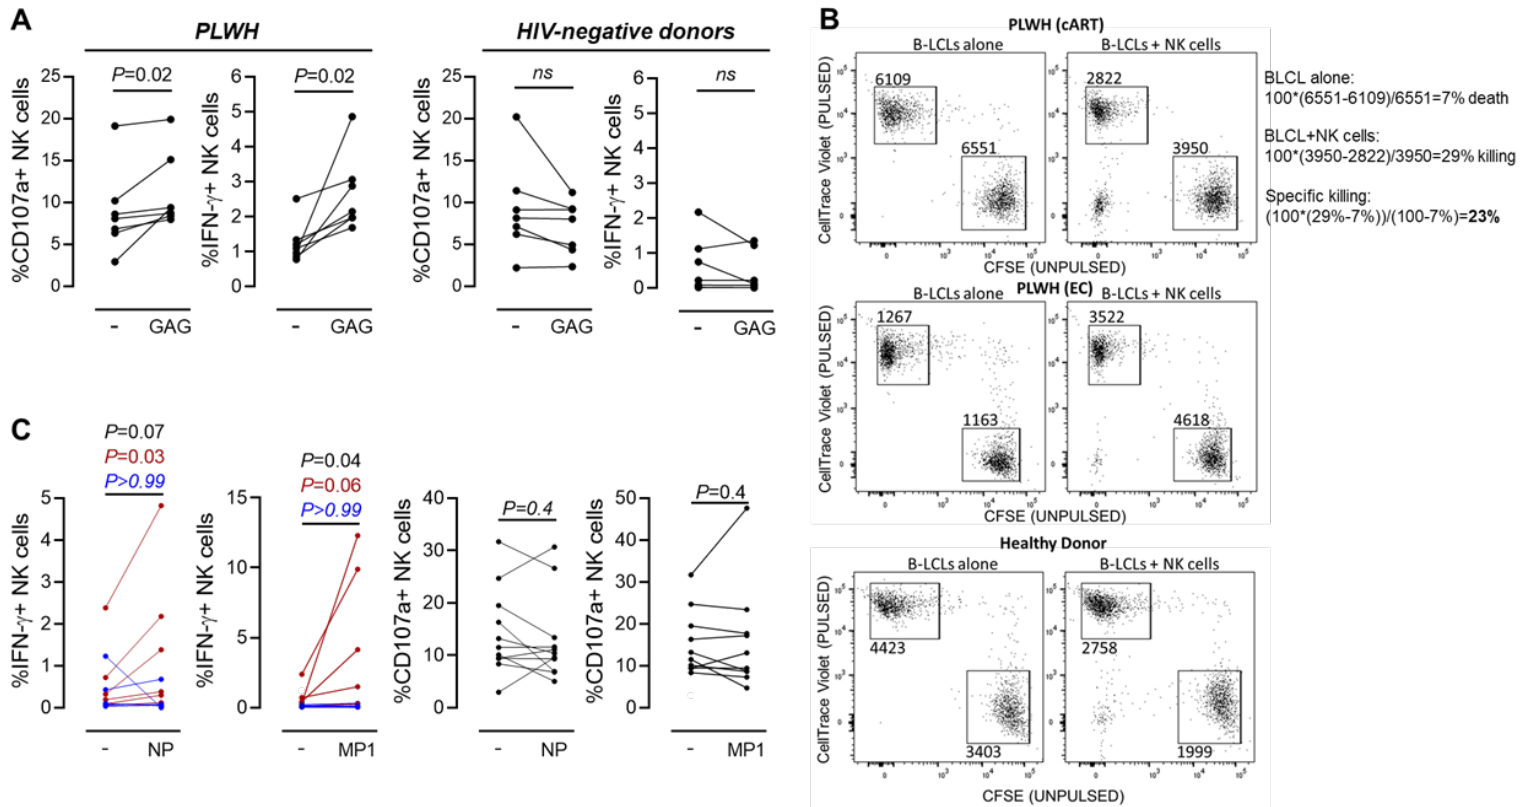

**Supplementary Fig. 1. Human primary NK cells mediate antigen-specific responses against HIV and influenza. (A)** Enriched NK cells from 7 PLWH (left panels) and 7 HIV-negative healthy donors (right panels) were co-cultured with autologous BLCL that had been pulsed with 2ug/mL peptide pools derived from HIV Gag (HIV-1 Consensus B; provided by the NIH AIDS Reagent Program) and NK cell responses assessed by ICS. Dead cells were excluded. Paired plots show proportions of CD107a<sup>+</sup> and IFN- $\gamma$ <sup>+</sup> NK cells in the absence (unstimulated) or presence of the peptide pool. Statistical significance was tested using Wilcoxon signed-rank test. ns, not significant. **(B)** Representative flow cytometry plots depicting CellTrace Violet-stained HIV Gag peptide-pulsed and CFSE-stained unpulsed BLCL from a cART-treated PLWH (upper panels), an elite controller (EC) (middle panels) and a healthy donor (lower panels) alone (left panels) or in the presence of autologous purified NK cells (right panels), after gating on CD3<sup>neg</sup> CD19<sup>pos</sup> lymphocytes. Representative example of specific lysis calculation is provided based on the following formula: (% sample lysis with NK effectors - % basal lysis without NK effectors) / (100 - % basal lysis without NK effectors). **(C)** Enriched NK cells from 11 HIV-negative healthy donors were incubated overnight with 2ug/mL peptide pools derived from influenza A/California/04/2009(H1N1) NP and A/California/08/2009(H1N1) MP1 and NK cell responses assessed by ICS. Dead cells were excluded. Paired plots show proportions of IFN- $\gamma$ <sup>+</sup> and CD107a<sup>+</sup> NK cells in the absence (unstimulated) or presence of indicated peptide pools. For IFN- $\gamma$ , p-values are indicated for all donors (in black) and for donors displaying responses at least 2-fold above (in red) or less than 2-fold above (in blue) unstimulated. Statistical significance was tested using Wilcoxon signed-rank test **(A and C)**.

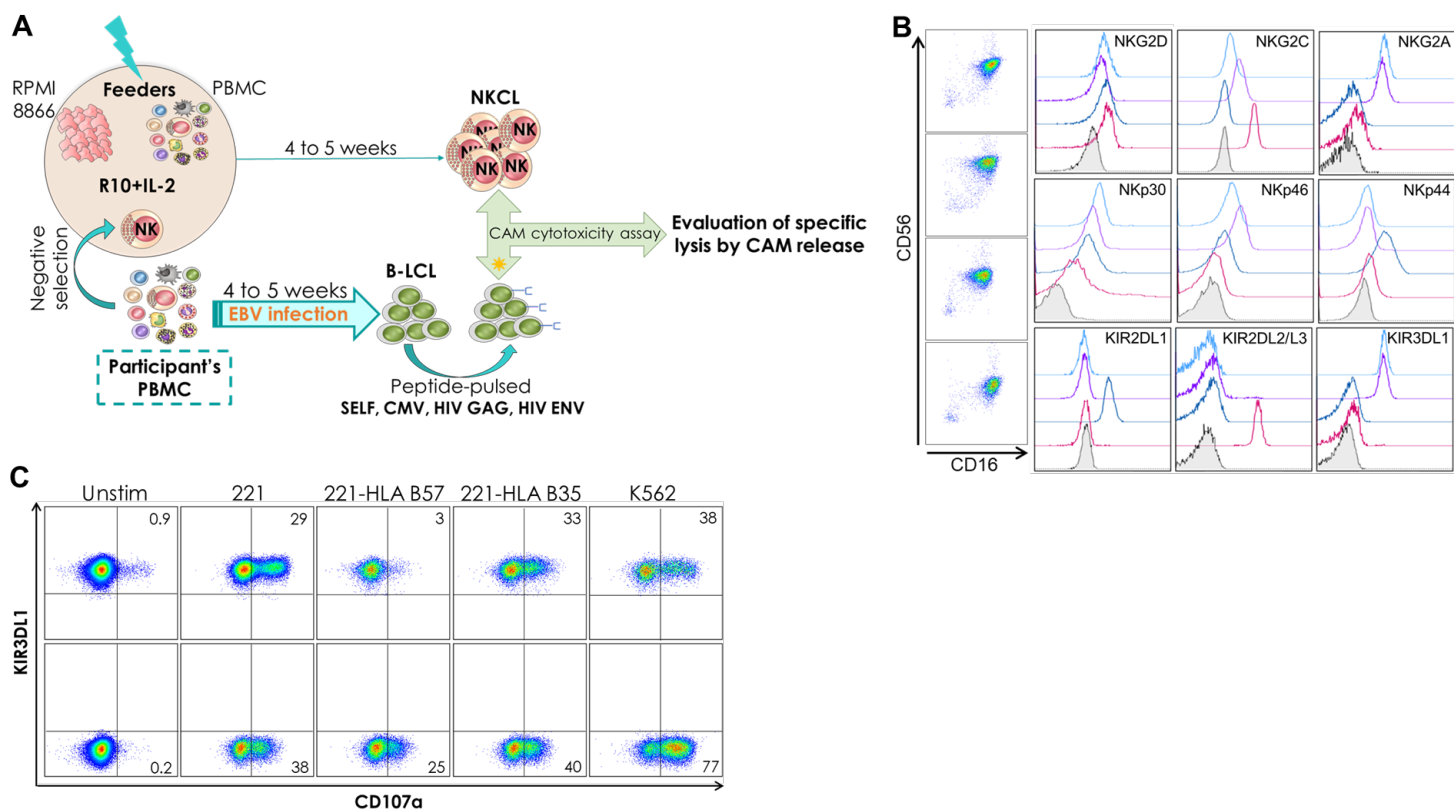

**Supplementary Fig. 2. Generation and characterization of human NK cell clones (NKCL).**

**(A)** Graphical design of the methodology to generate NKCL and evaluate their cytotoxic potential against autologous BLCL presenting viral antigens. **(B)** Representative flow cytometry plots showing CD16 and CD56 expression as well as differential expression of 9 typical NK cell markers on four different NKCL generated from PBMC of one single individual. Colored histograms represent the fluorescence intensity of indicated surface markers expression on NK cells. Tinted grey histograms show the background fluorescence of each investigated antibody determined using an FMO (Fluorescence Minus One) control. **(C)** Functional analysis of peripheral blood NKCL. CD107a upregulation was measured by flow cytometry after incubation of NK cell clones with indicated target cells at a 1:1 E:T ratio. As expected, activation of an exemplary KIR3DL1-expressing NK cell clone was inhibited by the expression of the cognate HLA-Bw4 ligand (here HLA-B57) on 221 cells, but not by HLA-Bw6 molecules (here HLA-B35). NKCL responded to 221 cells, 221 cells expressing HLA-B35 and K562 cells independently of KIR3DL1 expression.

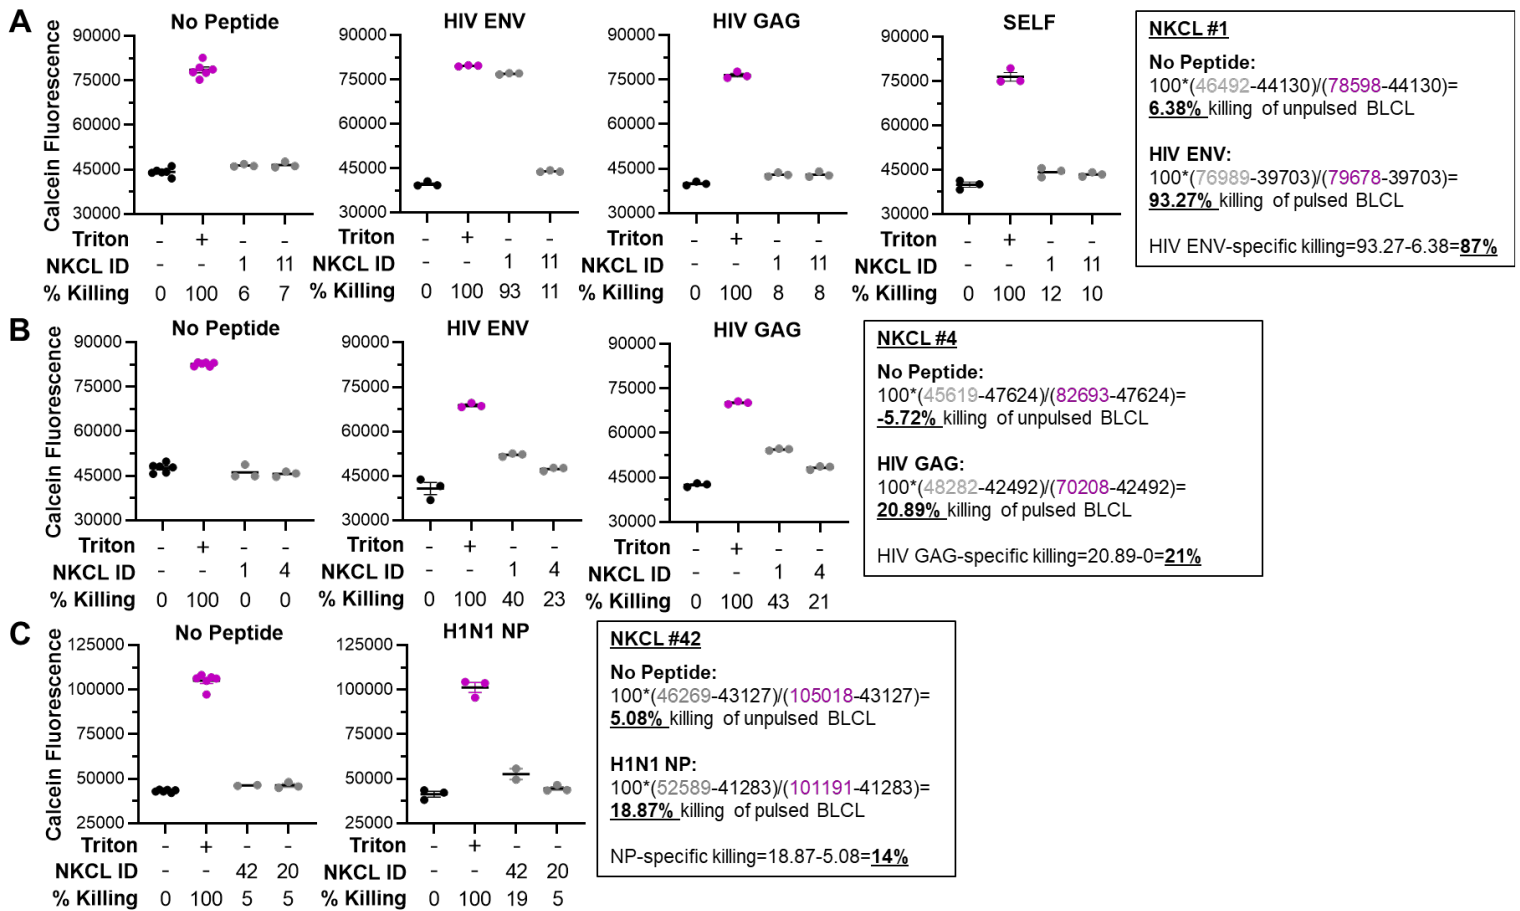

**Supplementary Fig. 3. Measures of antigen-specific responses by NKCL using CAM cytotoxicity assays.** Representative plots displaying unmodified calcein fluorescence data reflecting release of CAM into the supernatant upon target cell lysis and measured using a Perkin Elmer fluorescence reader (excitation 485 nm, absorption 530 nm) **(A)** for 2 NKCL, including one with (NKCL 1) and one without (NKCL 11) HIV Env-specific killing activity, from one PLWH, **(B)** for 2 NKCL responding to both HIV Env and HIV Gag (NKCL 1 and 4) from another PLWH and **(C)** for 2 NKCL, including one with (NKCL 42) and one without (NKCL 20) influenza H1N1 NP-specific killing activity, from one healthy donor. Examples of percent-specific lysis calculation for two NKCL are provided:  $(\text{test release} - \text{spontaneous release}) / (\text{maximum release} - \text{spontaneous release}) \times 100$ , where spontaneous release is obtained from wells containing target cells in the absence of effector cells or triton (black dots), maximum release from wells containing target cells in the absence of effector cells and addition of triton (purple dots) and test release from wells containing effector and target cells at a 5:1 E:T ratio (grey dots).

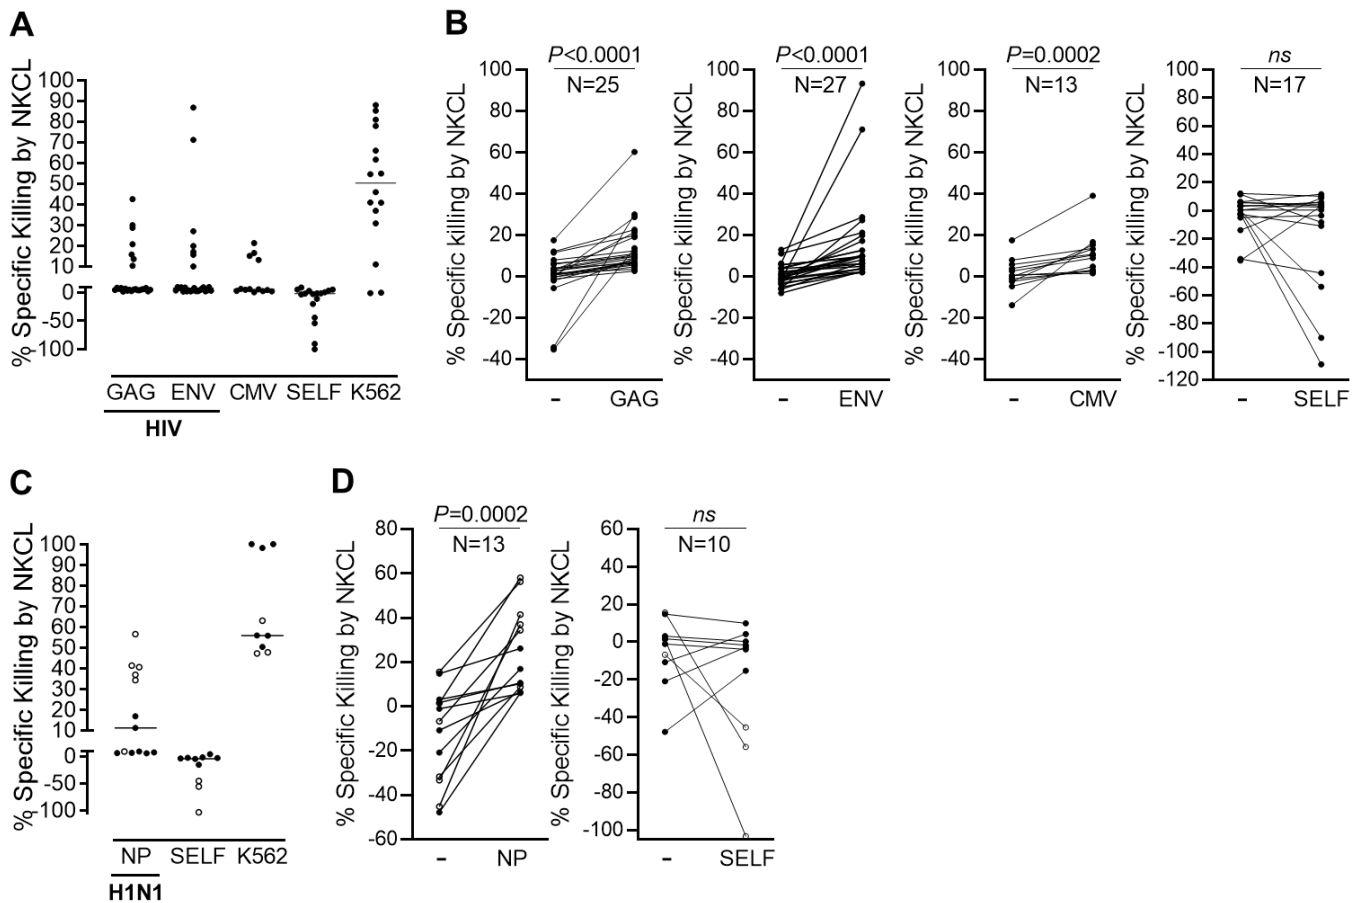

**Supplementary Fig. 4. Single-cell cloning of human antigen-specific NK cells.** Percentages of antigen-specific lysis by 50 NKCL generated from 12 PLWH against HIV Gag-, HIV Env-, CMV pp65-, and self-antigen-derived peptide pools or HLA-deficient K562 cells (**A**), after subtracting background (mock-pulsed BLCL) and (**B**), compared to non-specific killing of mock-pulsed BLCL for each NKCL. Percentages of antigen-specific lysis by 13 NKCL generated from 4 healthy donors against influenza H1N1 NP- and self-antigen-derived peptide pools or HLA-deficient K562 cells (**C**), after subtracting background (mock-pulsed BLCL) and (**D**), compared to non-specific killing of mock-pulsed BLCL for each NKCL. Full circle, positive for IgG antibodies against influenza A. Empty circle, not tested for the presence of IgG antibodies against influenza A. CAM cytotoxicity assays were used to evaluate lysis after co-culture of NKCL with autologous BLCL pulsed with indicated peptide pools. Non-specific lysis was assessed by measuring killing of mock-pulsed autologous BLCL, self-peptides-pulsed BLCL (negative control) and HLA-deficient K562 cells (positive control). Statistical significance was tested using Wilcoxon signed-rank test (**B** and **D**). ns, not significant.

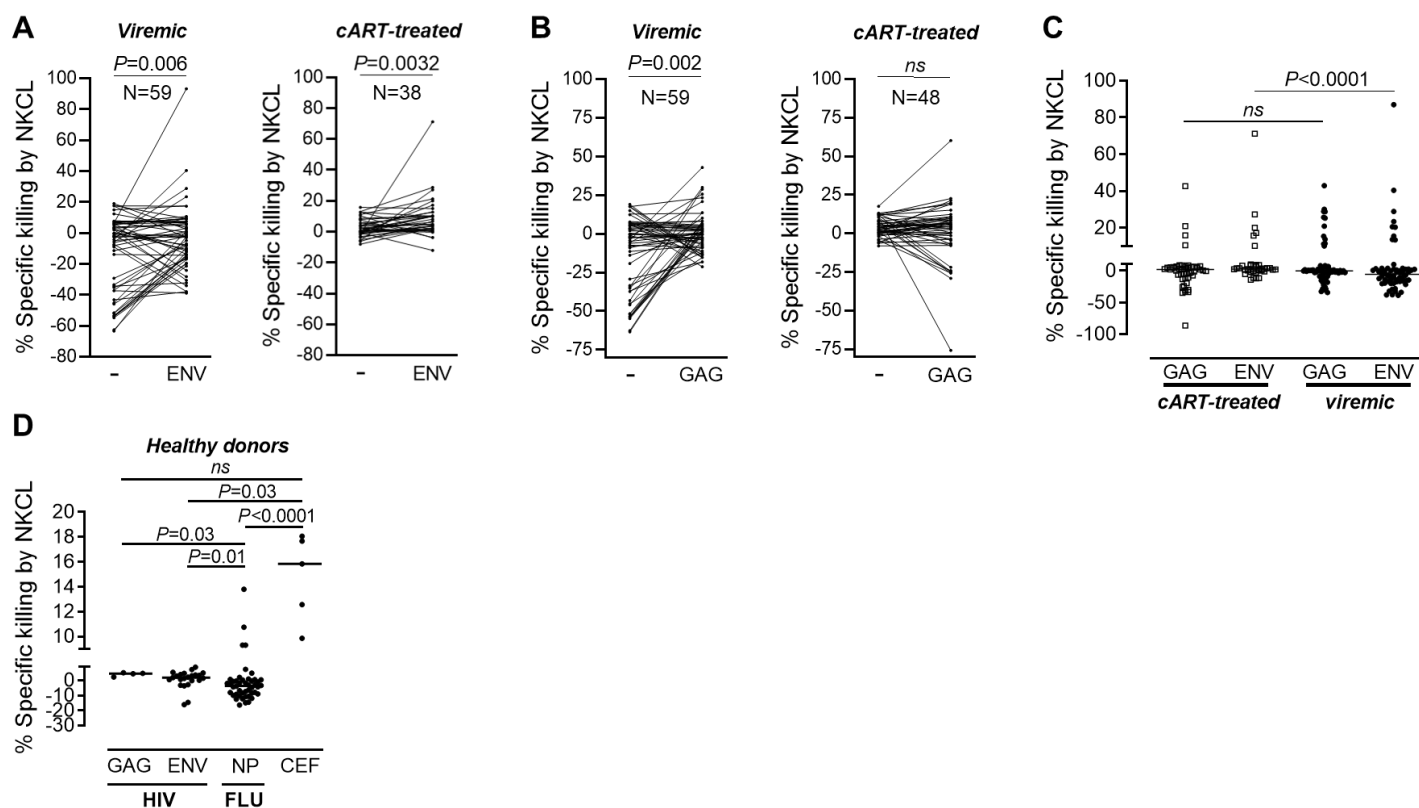

**Supplementary Fig. 5. HIV-specific responses by NKCL generated from cART-treated PLWH, untreated viremic PLWH and HIV naïve healthy donors. (A)(B)** Paired plots displaying percentages of antigen-specific lysis by 133 NKCL generated from 4 cART-treated PLWH and 16 untreated viremic PLWH against HIV Env **(A)** or HIV Gag **(B)** compared to non-specific killing of mock-pulsed BLCL for each NKCL and **(C)** after subtracting background (mock-pulsed BLCL). **(D)** Percentages of antigen-specific lysis by 63 NKCL generated from 11 HIV-negative healthy donors against HIV Gag-, HIV Env-, influenza H1N1 NP-derived peptides and a pool of CMV, EBV and influenza peptides after subtracting background (mock-pulsed BLCL). CAM cytotoxicity assays were used to evaluate lysis after co-culture of NKCL with autologous BLCL pulsed with indicated peptide pools. Statistical significance was tested using Wilcoxon signed-rank tests (a and b), Mann-Whitney U tests **(A)**, or Kruskal Wallis tests with Dunn's multiple comparison test **(D)**. ns, not significant.

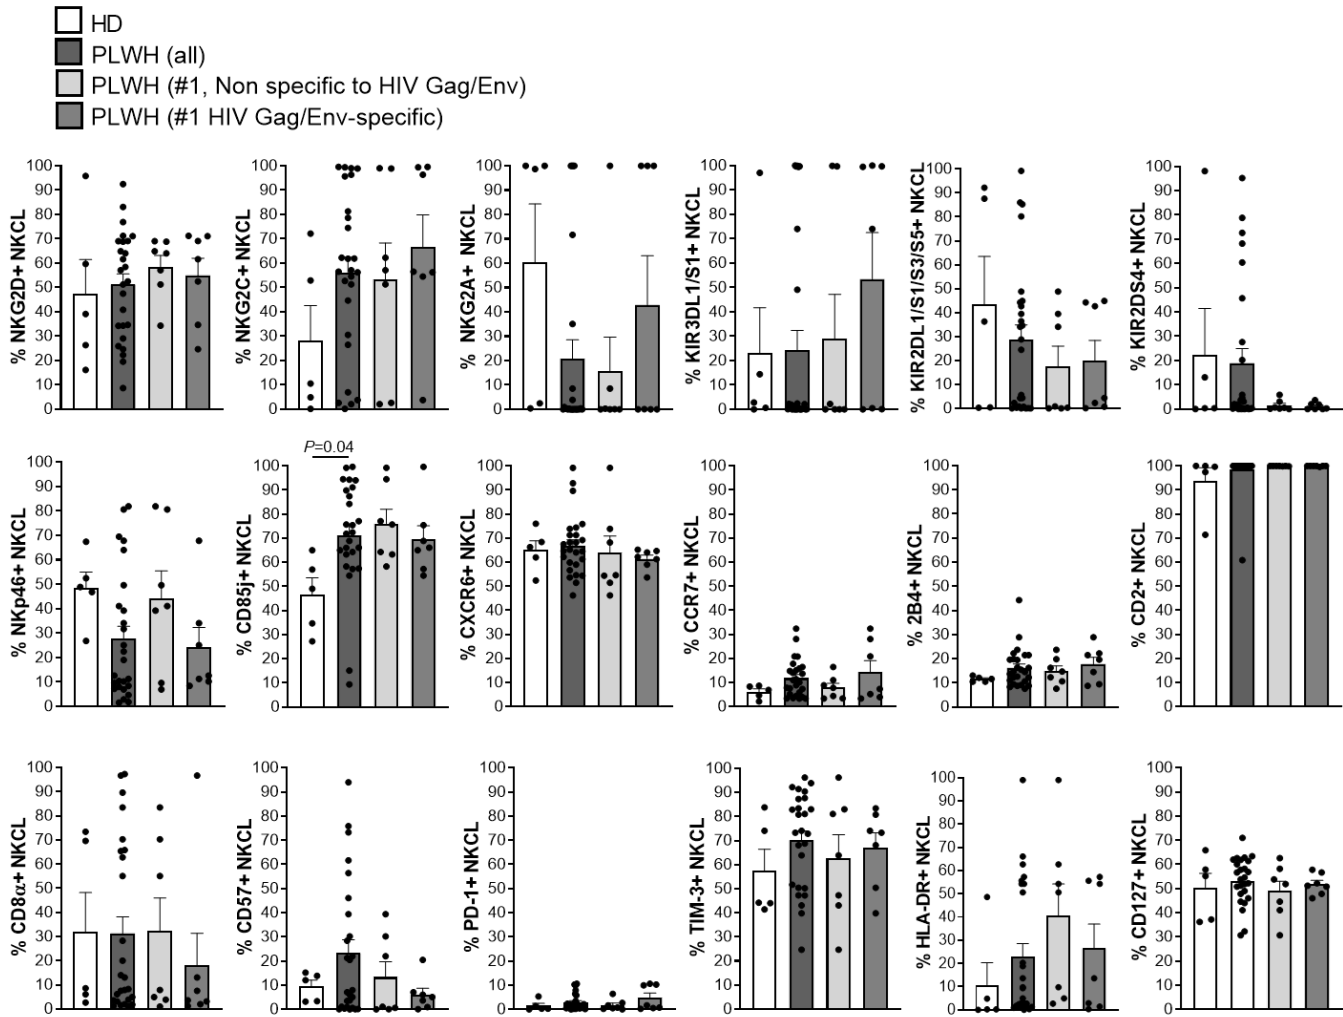

**Supplementary Fig. 6. Phenotypic analysis of NKCL generated from PLWH and HIV naïve healthy donors.** Bar graphs show mean + SEM proportions of NKCL expressing indicated surface markers evaluated by flow cytometry and comparing 5 NKCL from 2 healthy donors (HD, white bars) with 14 NKCL from one untreated viremic PLWH (darker grey bars), including 7 HIV Gag/Env-specific NKCL (dark grey bars) and 7 NKCL that did not react to HIV Gag/Env (light grey bars).

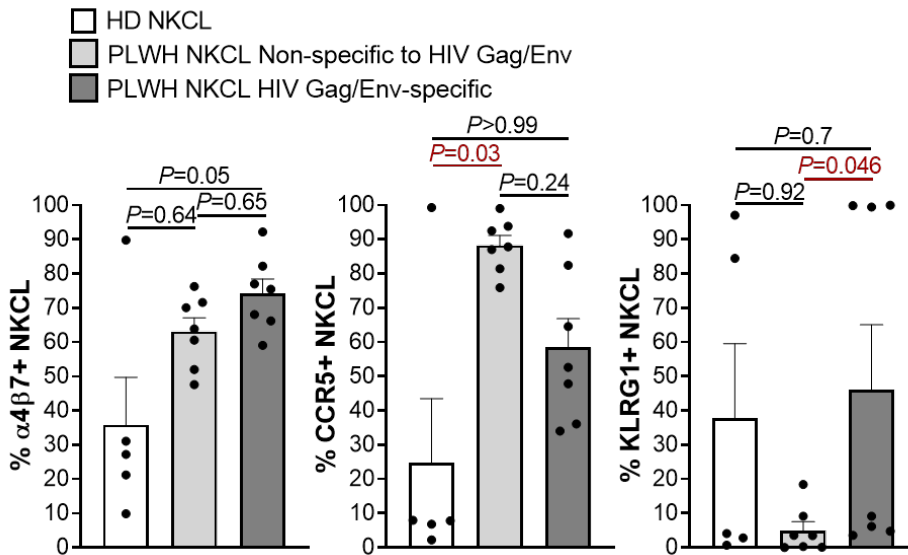

**Supplementary Fig. 7. Phenotypic differences between HIV reactive and non-HIV reactive NKCL.** Bar graphs show mean + SEM proportions of NKCL expressing  $\alpha 4\beta 7$ , CCR5 and KLRG1 evaluated by flow cytometry and comparing 5 NKCL from 2 healthy donors (HD) with 14 NKCL from one untreated viremic PLWH, including 7 HIV Gag/Env-specific NKCL and 7 NKCL that did not react to HIV Gag/Env. Statistical significance was tested using Kruskal Wallis test with Dunn's multiple comparison test. Statistically significant p-values are indicated in red.



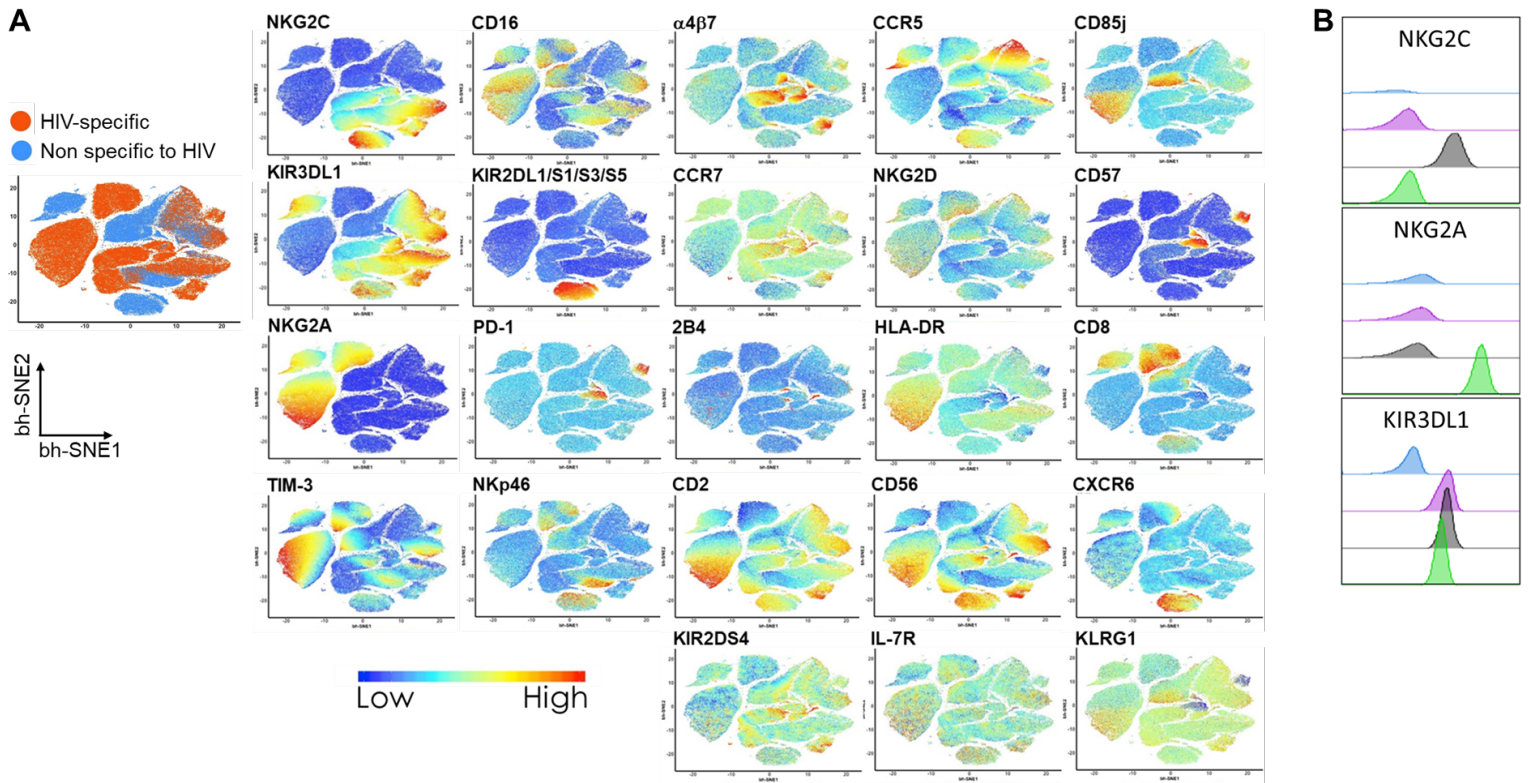

**Supplementary Fig. 8. HIV reactive NKCL are associated with NKG2A or NKG2C and/or KIR3DL1 expression.** (A) Multidimensional data analysis of 14 NKCL from one untreated viremic PLWH. Live NKCL were analyzed by *t*-SNE with bh-SNE to generate plots clustering cells with similar expression profiles. Relative expression of indicated NK cell markers visualized over the bh-SNE plots is displayed as a colorimetric scale of blue (low expression) to red (high expression). (B) Representative flow cytometry histograms displaying differential expression profiles of NKG2C, NKG2A and KIR3DL1 on 4 distinct NKCL.

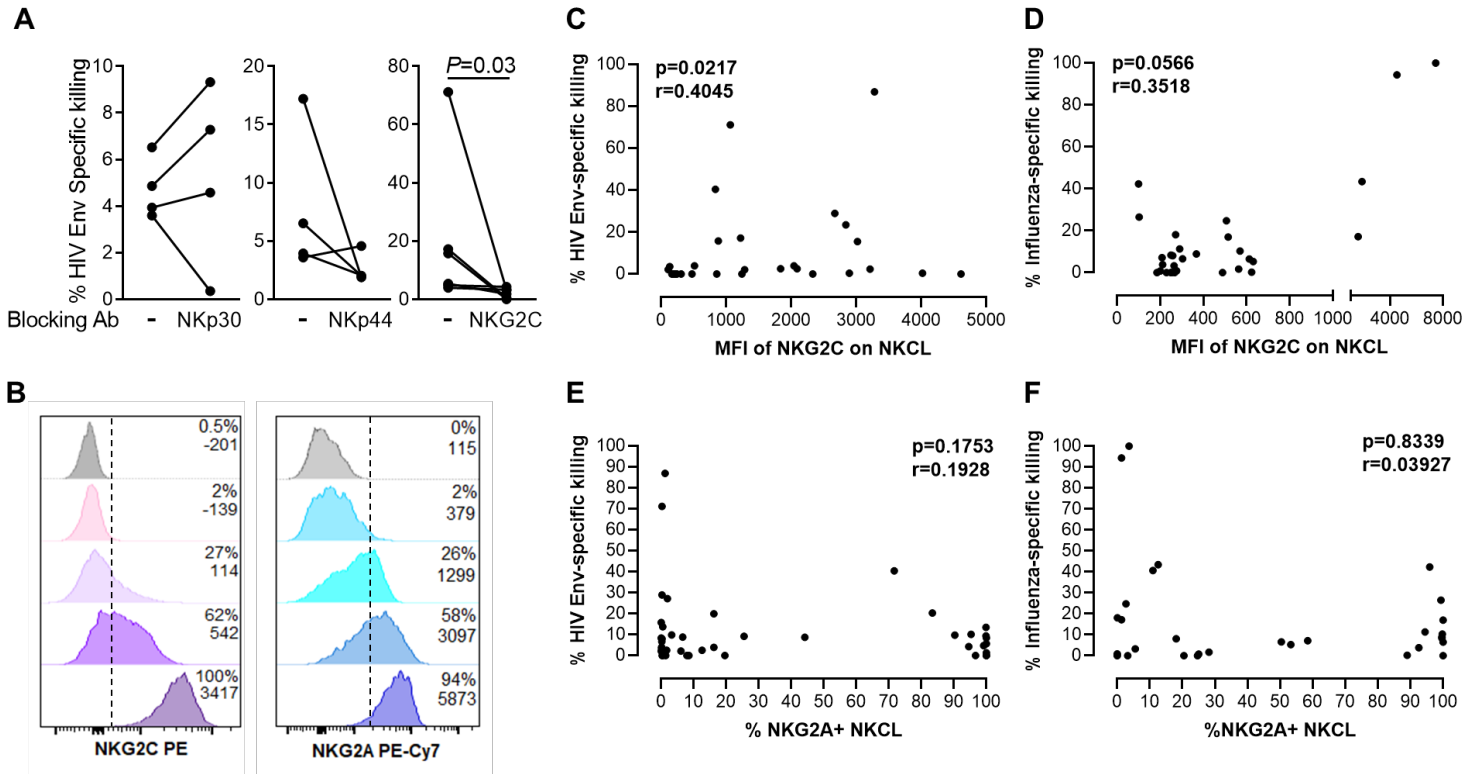

**Supplementary Fig. 9. Antigen-specific NKCL responses are associated with NKG2C expression.** (A) Antigen-specific killing of HIV Env-pulsed BLCL by NKCL in the presence of control or isotype control, NKp30, NKp44 or NKG2C blocking antibodies. Statistical significance was tested using Wilcoxon signed-rank tests. (B) Representative histograms showing NKCL with distinct NKG2C (right panel) or NKG2A expression (left panel). Frequencies of NKG2C<sup>+</sup> or NKG2A<sup>+</sup> NKCL were determined as the proportion of NKCL beyond an arbitrary cut-off line set at the right-hand side border of the NKG2C or NKG2A histogram in FMO controls (grey histograms). (C)(D) Spearman correlation analysis between the MFI of NKG2C on NKCL and specific killing of BLCL pulsed with HIV Env (C) or influenza NP, MP1, or HA (D). Spearman correlation analysis between frequencies of NKG2A<sup>+</sup> NKCL and specific killing of BLCL pulsed with HIV Env (E) or influenza NP, MP1, or HA (F).

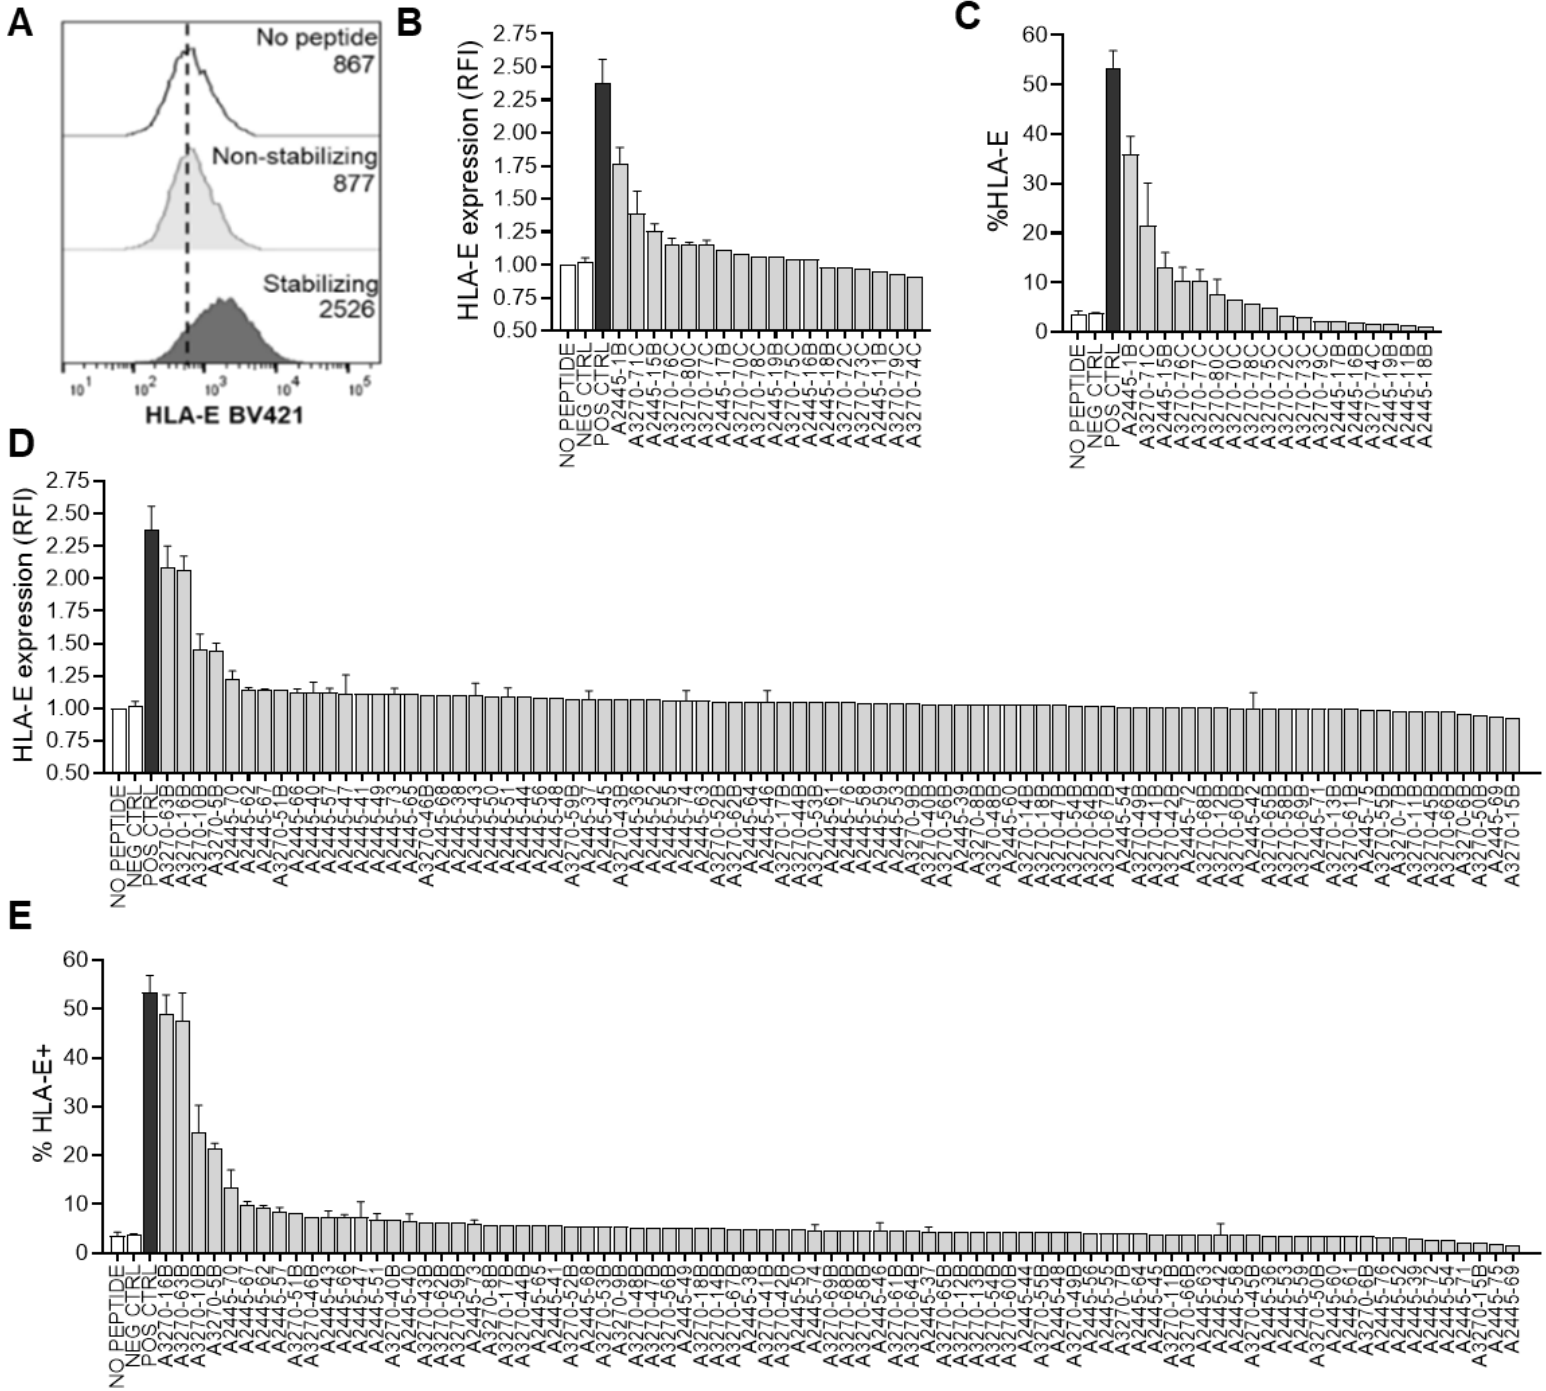

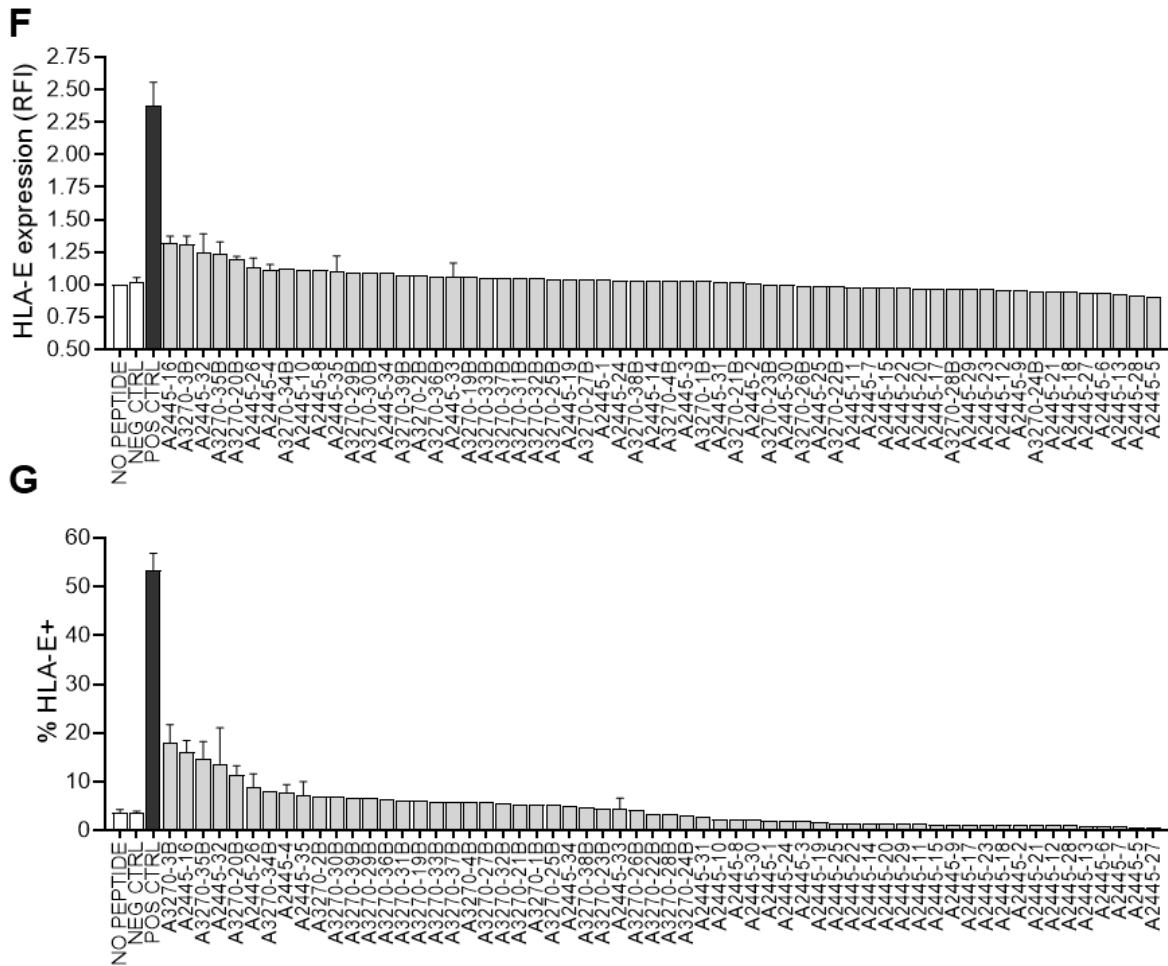

**Supplementary Fig. 10. Stabilization of HLA-E\*01:01 by HIV Env-, HIV Gag- and influenza NP-derived nonameric peptides.** (A) Representative flow cytometry plots showing HLA-E expression on K562 stably expressing HLA-E\*01:01 cells that were either left unpulsed (upper panel) or pulsed for 16 h at 26°C with 40uM of CMV-derived NLVPMVATV that do not stabilize HLA-E (middle panel), or with VMAPRTLIL, a CMV/HLA-Cw3 leader sequence-derived peptide that stabilizes HLA-E (lower panel). (B-G) K562 cells stably expressing HLA-E\*01:01 were either left mock pulsed or pulsed for 16h with 40uM of nonameric peptides derived from A/California/04/2009(H1N1) NP (18 total) (B-C), HIV consensus B Env (84 total) (D-E) and HIV consensus B Gag (60 total) (F-G) with strong binding prediction scores based on the NetMHC pan 4.0 and IEDB epitope prediction tools. Controls included CMV pp65-derived NLVPMVATV that do not stabilize HLA-E (NEG CTRL), and VMAPRTLFL, a CMV/HLA-G leader sequence-derived peptide that stabilizes HLA-E (POS CTRL). HLA-E surface stabilization was assessed by flow cytometry using anti-HLA-E antibody (3D12). Dead cells were excluded. Bars represent the relative mean fluorescence intensity (RFI) + SEM of HLA-E on K562 cells as compared to HLA-E expression in the absence of peptide (No Peptide) for all tested peptides (pooled from at least 2 distinct experiments where error bars are displayed) (B, D, F). Mean percentages of HLA-E<sup>+</sup> K562 cells + SEM are also shown for all tested peptides (C, E, G).

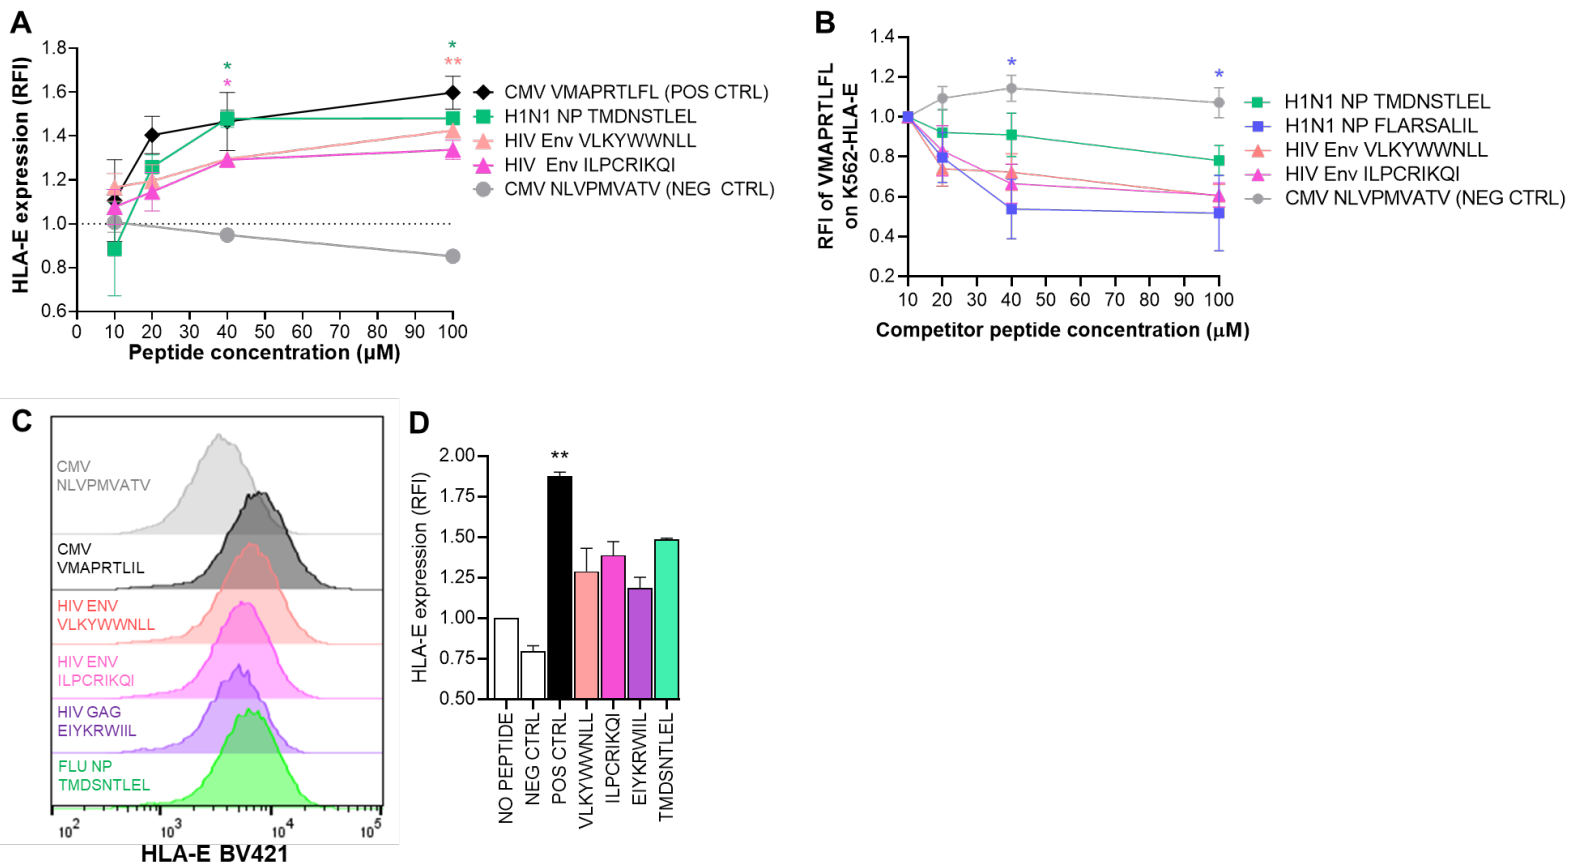

**Supplementary Fig. 11. HIV Env, HIV Gag and influenza NP encode for HLA-E-stabilizing peptides.** (A) Relative mean fluorescence intensity (RMFI) + SEM of HLA-E on K562 HLA-E\*01:01 cells as compared to HLA-E expression in the absence of peptide after pulsing with increasing concentrations of indicated peptides (n = 2 independent experiments). Asterisks, significant differences compared to K562 HLA-E\*01:01 pulsed with non-binding peptides (NEG CTRL). Statistical significance was tested using paired t tests  $**p < 0.01$ ,  $*p < 0.05$ . (B) Competition assay for binding to HLA-E. K562-HLA-E\*0101 cells were incubated overnight at 26°C with 10µM of FITC-conjugated VMAPRTLFL CMV peptide and increasing concentrations of the indicated unlabeled competitor peptides. Lines represent the relative mean fluorescence intensity (RFI) of HLA-E-bound FITC-labelled VMAPRTLFL peptide pooled from 3 independent experiments as compared to bound FITC-labelled VMAPRTLFL in the presence of 10µM of competitor peptide. Error bars represents the SEM. Statistical significance was tested using one-way ANOVA with Tukey's multiple comparisons test.  $*p < 0.05$ . (C-D) HLA-E stabilization on BLCL targets after pulsing with indicated individual peptides found to stabilize HLA-E on K562 HLA-E\*01:01 at 40µM for 2 hours in R10 medium. (C) Representative HLA-E surface detection by flow cytometry. Grey filled histogram: NLVPMVATV (NEG CTRL); back filled histogram: VMAPRTLIL (POS CTRL). (D) Bars represent the relative mean fluorescence intensity (RFI) + SEM of HLA-E on BLCL targets pulsed with indicated peptides pooled from 3 distinct experiments as compared to HLA-E expression in the absence of peptide (No Peptide). Statistical significance was tested using Friedman test with Dunn's multiple comparison test. Asterisks, significant differences compared to BLCL pulsed with non-binding peptides (NEG CTRL).  $**p < 0.01$ .

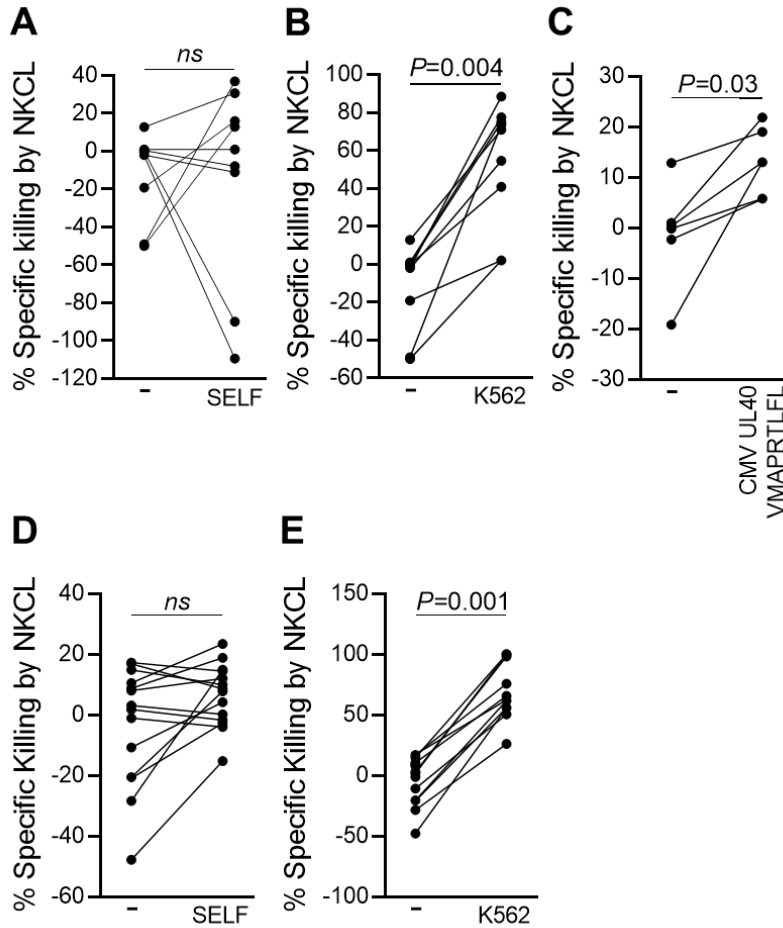

**Supplementary Fig. 12. Non-specific killing by NKCL.** For each NKCL generated from 5 untreated viremic PLWH (A-C) or from 5 healthy donors (D-E), paired graphs compare killing of mock pulsed autologous BLCL with percentages of non-specific lysis of self-peptide-pulsed BLCL (A, D), percentages of non-specific lysis of K562 cells (B, E) or percentages of CMV peptide-specific killing (C). CAM cytotoxicity assays were used to evaluate lysis after co-culture of NKCL with autologous BLCL pulsed with a self-peptide pool, HLA-deficient K562 cells, or a single HLA-E-binding nonameric peptides derived from CMV UL40. Statistical significance was tested using Wilcoxon signed-rank test. ns, not significant.

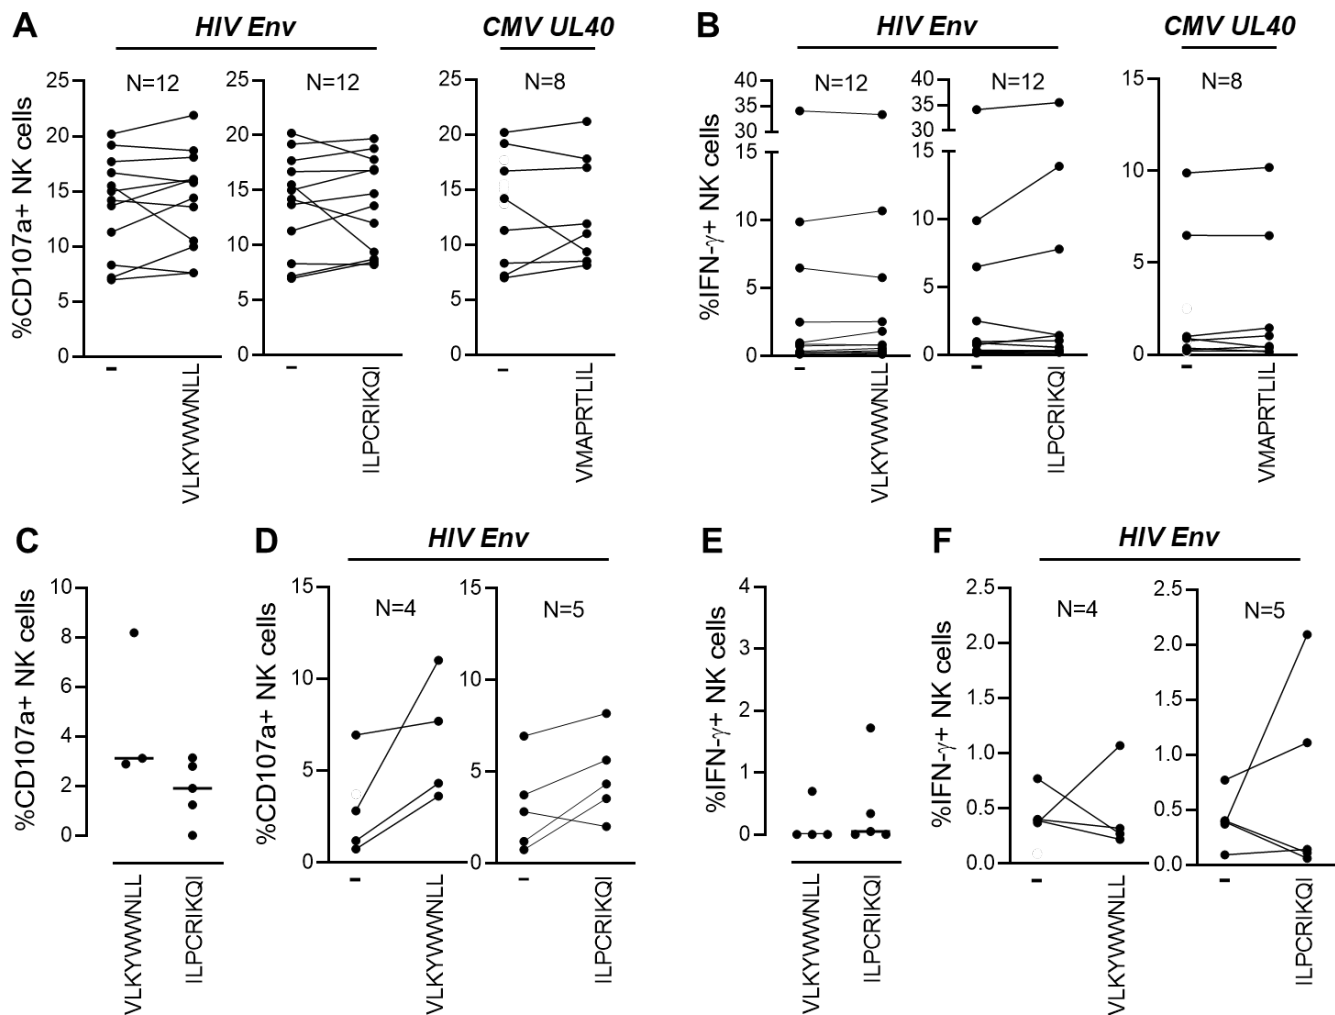

**Supplementary Fig. 13. HIV Env-derived HLA-E-binding peptides elicit primary NK cell responses.** Paired plots compare CD107a upregulation (**A, D**) or IFN- $\gamma$  production (**B, F**) between unstimulated NK cells and NK cells stimulated with indicated single HLA-E-stabilizing peptides derived from HIV Env or CMV UL40 using ICS on unfractionated PBMC from 12 PLWH (**A-B**) or enriched NK cells from 5 PLWH (**C-F**). **C, E**, Dot plots compare proportions of actively degranulating, cytotoxic NK cells, as judged by expression of CD107a (**C**) or IFN- $\gamma$  producing NK cells (**E**) from 5 PLWH in response to indicated HLA-E-stabilizing single peptides after subtracting proportions of CD107a<sup>+</sup> and IFN- $\gamma$ <sup>+</sup> unstimulated NK cells, respectively. Bars represent the median. Statistical significance was tested using Wilcoxon signed-rank test and p-values found not statistically significant ( $P > 0.05$ ).

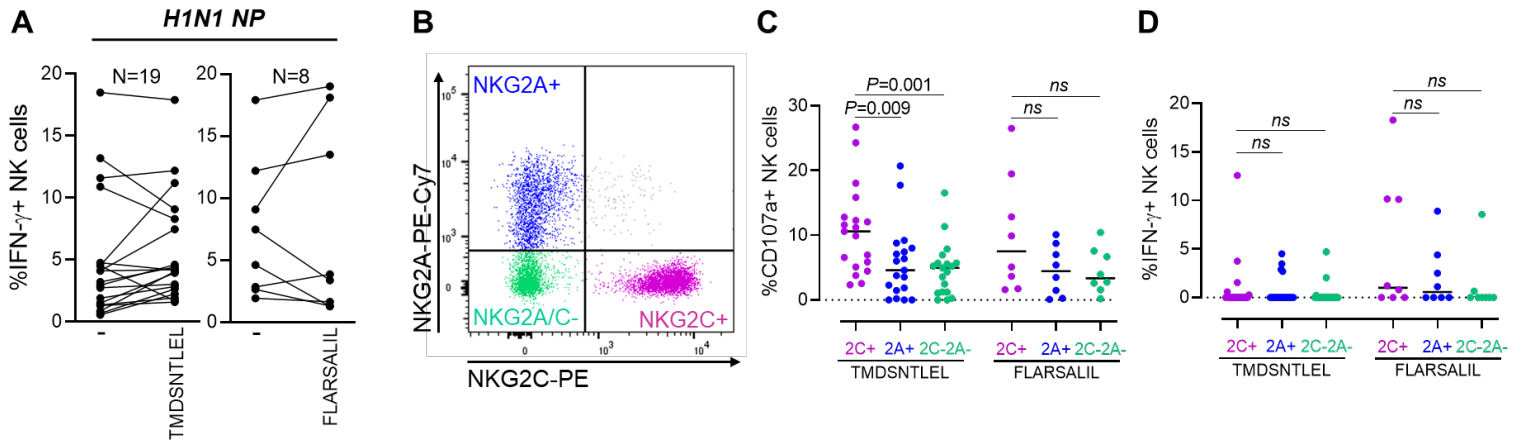

**Supplementary Fig. 14. Influenza NP-derived HLA-E-binding peptides elicit primary NKG2C<sup>+</sup> NK cell responses.** (A) Paired plots compare IFN- $\gamma$  production between unstimulated NK cells and NK cells stimulated with indicated single HLA-E-stabilizing peptides derived from influenza NP using ICS on enriched NK cells from 19 healthy donors. (B) Representative staining for NKG2A and NKG2C at the surface of CD56<sup>+</sup>CD16<sup>+</sup> NK cells from an HIV-negative healthy donor by flow cytometry. (C, D) Dot plots compare proportions of actively degranulating, cytotoxic NKG2C<sup>+</sup> (purple dots), NKG2A<sup>+</sup> (blue dots), and NKG2C<sup>-</sup>NKG2A<sup>-</sup> (green dots) NK cells, as judged by expression of CD107a (C) or NKG2C<sup>+</sup> (purple dots), NKG2A<sup>+</sup> (blue dots) and NKG2C<sup>-</sup>NKG2A<sup>-</sup> (green dots) IFN- $\gamma$  producing NK cells (D) from 19 healthy donors in response to indicated HLA-E-stabilizing single peptides after subtracting proportions of CD107a<sup>+</sup> and IFN- $\gamma$ <sup>+</sup> unstimulated NK cells, respectively. Bars represent the median. Statistical significance was tested using Wilcoxon signed-rank test (A) or Friedman test with Dunn's multiple comparison test (C-D). ns, not significant.



| <b>Supplementary Table 1. Characteristics of PLWH and healthy donors</b> |                           |                                |                                    |                                |
|--------------------------------------------------------------------------|---------------------------|--------------------------------|------------------------------------|--------------------------------|
| <b>Clinical Data</b>                                                     | <b>Viremic<br/>(n=27)</b> | <b>cART treated<br/>(n=21)</b> | <b>elite controllers<br/>(n=4)</b> | <b>HIV-negative<br/>(n=66)</b> |
| Median HIV viral load [IQR] (RNA cop/mL)                                 | 14,100 [28,790]           | <50                            | <50                                | NA                             |
| Median CD4 cell count [IQR] (cells/mm <sup>3</sup> )                     | 599 [286]                 | 624 [355]                      |                                    | NA                             |
| N with available clinical data                                           | 26                        | 3                              | 0                                  | NA                             |

PLWH, People living with HIV; cART, combination antiretroviral therapy; IQR, interquartile range; NA, not applicable

**Supplementary Table 2. 28-color panel for NKCL phenotyping**

| <b>Target</b>     | <b>Fluorochrome</b> | <b>Clone</b> | <b>Manufacturer</b>  |
|-------------------|---------------------|--------------|----------------------|
| LIVE cells        | Blue Live/Dead      |              | Invitrogen           |
| CD19              | PE-CY5.5            | J3-119       | BECKMAN COULTER      |
| CD14              | BUV615              | M5E2         | BD Pharmingen        |
| CD3               | BUV496              | UCHT1        | BD Pharmingen        |
| CD4               | BB700               | L200         | BD Pharmingen        |
| CD56              | BUV737              | NCAM16.2     | BD Pharmingen        |
| CD16              | BUV563              | 3G8          | BD Pharmingen        |
| NKP46             | BV711               | 9E2/NKp46    | BD Pharmingen        |
| NKG2D             | BB790               | 1D11         | BD Pharmingen        |
| NKG2C             | Biotin + SA BUV395  | REA205       | MILTENYI             |
| NKG2A             | PE-CY7              | Z199         | BECKMAN COULTER      |
| KIR3DL1/S1        | VioBlue             | REA168       | MILTENYI             |
| KIR2DL1/S1/S3/S5  | FITC                | HP-MA4       | BIOLEGEND            |
| KIR2DS4           | APC-Vio770          | REA284       | MILTENYI             |
| CD85J             | PE                  | GHI/75       | BD Pharmingen        |
| $\alpha 4\beta 7$ | APC                 |              | NHP Reagent Resource |
| CXCR6             | BV786               | 13B 1E5      | BD Pharmingen        |
| CCR5              | PE-CY5              | 2D7/CCR5     | BD Pharmingen        |
| CCR7              | APC-R700            | 3D12         | BD Pharmingen        |
| 2B4               | BV650               | 2-69         | BD Pharmingen        |
| CD2               | BV510               | 2H7          | BD Pharmingen        |
| CD8               | BV570               | RPA-T8       | BIOLEGEND            |
| CD57              | BB630               | NK-1         | BD Pharmingen        |
| KLRG1             | PE-Dazzle594        | 2F1/KLRG1    | BIOLEGEND            |
| PD1               | BV605               | EH12.1       | BD Pharmingen        |
| TIM-3             | BV750               | 7D3          | BD Pharmingen        |
| HLA-DR            | BUV661              | G46-6        | BD Pharmingen        |
| IL-7R             | BUV805              | HIL-7R-M21   | BD Pharmingen        |

**Supplementary Table 3.** HIV- and influenza-derived nonamers tested for binding to HLA-E\*01:01

| HIV Gag   |            |          | HIV Env  |            |          | A/California/7/2009(H1N1) NP |           |          |
|-----------|------------|----------|----------|------------|----------|------------------------------|-----------|----------|
| ID        | Sequence   | Position | ID       | Sequence   | Position | ID                           | Sequence  | Position |
| A2445-1   | VWASRELER  | 35       | A2445-36 | LWRWGTMLL  | 13       | A2445-1B                     | TMDSNTLEL | 373      |
| A2445-2   | SRELERFAV  | 38       | A2445-37 | TMLLGLMLI  | 18       | A2445-11B                    | LRGSVAHKS | 266      |
| A2445-3   | ERFAVNPGI  | 42       | A2445-38 | VWKEATTTL  | 43       | A2445-15B                    | FLARSALIL | 258      |
| A2445-4   | ILGQLQPSL  | 60       | A2445-39 | EATTTLFCA  | 46       | A2445-16B                    | LMQGSTLPR | 166      |
| A2445-5   | QVSQNYPIV  | 127      | A2445-40 | ATHACVPTD  | 69       | A2445-17B                    | VIPRGKLSL | 352      |
| A2445-6   | QNYPIVQNL  | 130      | A2445-41 | ENVTFENFM  | 86       | A2445-18B                    | GMDPRMCSL | 158      |
| A2445-7   | VHQAISPR   | 143      | A2445-42 | QMHEDIISL  | 102      | A2445-19B                    | MMESAKPED | 447      |
| A2445-8   | VVEEKAFSP  | 158      | A2445-43 | IISLWDQSL  | 107      | A3270-70C                    | ATYQRTRAL | 146      |
| A2445-9   | FSPEVIPMF  | 164      | A2445-44 | VQKEYALFY  | 168      | A3270-71C                    | ATNPVPSF  | 471      |
| A2445-10  | PEVIPMFSA  | 166      | A2445-45 | QKEYALFYK  | 169      | A3270-72C                    | RLIQNSITI | 55       |
| A2445-11  | QMLKETINE  | 199      | A2445-46 | VITQACPKV  | 200      | A3270-73C                    | RMIGGIGRF | 31       |
| A2445-12  | HAGPIAPGQ  | 219      | A2445-47 | ACPKVSFEP  | 204      | A3270-74C                    | MSNEGSYFF | 481      |
| A2445-13  | WMTNNPIPI  | 249      | A2445-48 | VSFEPPIPIH | 208      | A3270-75C                    | ASNENVETM | 366      |
| A2445-14  | TNNPIPIVG  | 251      | A2445-49 | CAPAGFAIL  | 218      | A3270-76C                    | ATAGLTHIM | 129      |
| A2445-15  | IVRMYSPTS  | 273      | A2445-50 | KCNDKKFNG  | 227      | A3270-77C                    | KLSTRGVQI | 357      |
| A2445-16  | RMYSPTSIL  | 275      | A2445-51 | IRPVVSTQL  | 251      | A3270-78C                    | VGIDPFKLL | 299      |
| A2445-17  | YSPTSILDI  | 277      | A2445-52 | VIRSENFTD  | 271      | A3270-79C                    | WMACHSAAF | 343      |
| A2445-18  | RQGPKEPFR  | 286      | A2445-53 | IGPGRAFYT  | 309      | A3270-80C                    | VAYERMCNI | 230      |
| A2445-19  | QGPKPEFRD  | 287      | A2445-54 | GNKTIVFNQ  | 353      |                              |           |          |
| A2445-20  | RDYVDRFYK  | 294      | A2445-55 | CNTTQLFNS  | 383      |                              |           |          |
| A2445-21  | VKNWMTETL  | 313      | A2445-56 | TKDKNTITL  | 402      |                              |           |          |
| A2445-22  | ILKALGPAA  | 333      | A2445-57 | TLPCRKIQI  | 409      |                              |           |          |
| A2445-23  | LGPAATLEE  | 337      | A2445-58 | NNDTEIFRP  | 456      |                              |           |          |
| A2445-24  | RVLAEAMSQ  | 361      | A2445-59 | VAPTKAKRR  | 490      |                              |           |          |
| A2445-25  | VTNSATIMM  | 370      | A2445-60 | VGIGAMFLG  | 507      |                              |           |          |
| A2445-26  | IMMQRGNFR  | 376      | A2445-61 | TMGAASMTL  | 523      |                              |           |          |
| A2445-27  | MMQQRGNFRN | 377      | A2445-62 | TLTVQARQL  | 530      |                              |           |          |
| A2445-28  | RKTVKCFNC  | 387      | A2445-63 | TVQARQLLS  | 532      |                              |           |          |
| A2445-29  | AKNCRAPRK  | 402      | A2445-64 | AIEAQQHLL  | 552      |                              |           |          |
| A2445-30  | TERQANFLG  | 427      | A2445-65 | IKQLQARVL  | 567      |                              |           |          |
| A2445-31  | KGRPGNFLQ  | 442      | A2445-66 | QLQARVLAV  | 569      |                              |           |          |
| A2445-32  | RPEPTAPPE  | 452      | A2445-67 | RVLAVERYL  | 573      |                              |           |          |
| A2445-33  | APPEESFRF  | 457      | A2445-68 | ICTTTVPWN  | 597      |                              |           |          |
| A2445-34  | IDKELYPLA  | 479      | A2445-69 | LWYIKIFIM  | 673      |                              |           |          |
| A2445-35  | SLFGNDPSS  | 491      | A2445-70 | IMIVGGLIG  | 680      |                              |           |          |
| A3270-1B  | YVDRFYKTL  | 296      | A2445-71 | IGLRIVFAV  | 687      |                              |           |          |
| A3270-2B  | SLYNTVATL  | 77       | A2445-72 | VRQGYSPLS  | 702      |                              |           |          |
| A3270-3B  | KALGPAATL  | 335      | A2445-73 | GYSPLSFQT  | 705      |                              |           |          |
| A3270-4B  | ATPQDLNTM  | 179      | A2445-74 | QTRLPAPRG  | 712      |                              |           |          |
| A3270-19B | SLQTGSEEL  | 67       | A2445-75 | LPAPRGPDR  | 715      |                              |           |          |
| A3270-20B | RFAVNPGLL  | 43       | A2445-76 | IVTRIVELL  | 771      |                              |           |          |

|           |           |     |
|-----------|-----------|-----|
| A3270-21B | HQAISPRTL | 144 |
| A3270-22B | VLAEAMSQV | 362 |
| A3270-23B | KQEPIDKEL | 475 |
| A3270-24B | AMQMLKETI | 197 |
| A3270-25B | AGPIAPGQM | 220 |
| A3270-26B | RQANFLGKI | 429 |
| A3270-27B | HIVWASREL | 33  |
| A3270-28B | SQVTNSATI | 368 |
| A3270-29B | MTNPNPIP  | 250 |
| A3270-30B | AFSPEVIPM | 163 |
| A3270-31B | EVIPMFSAL | 167 |
| A3270-32B | RTLNAWVKV | 150 |
| A3270-33B | YPLASLRSL | 484 |
| A3270-34B | ASQEVKNWM | 309 |
| A3270-35B | EIYKRWIL  | 260 |
| A3270-36B | RAEQASQEV | 305 |
| A3270-37B | ASVLSGGEL | 5   |
| A3270-38B | VRMYSPTSI | 274 |
| A3270-39B | ISPRTLNAW | 147 |

|           |           |     |
|-----------|-----------|-----|
| A3270-5B  | LLQYWSQEL | 795 |
| A3270-6B  | CSSNITGLL | 440 |
| A3270-7B  | IVQQQNNLL | 544 |
| A3270-8B  | KLTPLCVTL | 120 |
| A3270-9B  | KVQKEYALF | 167 |
| A3270-10B | RLVDGFLAL | 743 |
| A3270-11B | RVRQGYSP  | 703 |
| A3270-12B | SSNITGLLL | 441 |
| A3270-13B | CTDLKNNLL | 130 |
| A3270-14B | FSDNANTII | 288 |
| A3270-15B | HMGPGRALF | 319 |
| A3270-16B | ILPCRKIQI | 423 |
| A3270-17B | LLQYWSQEL | 793 |
| A3270-18B | STPLADGFL | 756 |
| A3270-40B | ASLWNWFDI | 663 |
| A3270-41B | AVGIGAMFL | 508 |
| A3270-42B | FFYCNTTQL | 380 |
| A3270-43B | FLGAAGSTM | 518 |
| A3270-44B | FSYHRLRDL | 762 |
| A3270-45B | FTNNAKTII | 277 |
| A3270-46B | HLWRWGTML | 12  |
| A3270-47B | IGAMFLGFL | 511 |
| A3270-48B | KVSFEPIPI | 207 |
| A3270-49B | LGRRGWEVL | 781 |
| A3270-50B | LISCNTSVI | 193 |
| A3270-51B | LLGRRGWEV | 780 |
| A3270-52B | LTVQARQLL | 533 |
| A3270-53B | LVDGFLALI | 744 |
| A3270-54B | RAFYTTGEI | 313 |
| A3270-55B | RAIEAQQHL | 553 |
| A3270-56B | RQGLERALL | 844 |
| A3270-58B | RYLKDQQLL | 581 |
| A3270-59B | SLDEIWDNM | 614 |
| A3270-60B | STVQCTHGI | 243 |
| A3270-61B | SYHRLRDLL | 763 |
| A3270-62B | VLENTENF  | 83  |
| A3270-63B | VLKYWWNLL | 788 |
| A3270-64B | VSLLNATAI | 808 |
| A3270-65B | VTLNCTDLM | 126 |
| A3270-66B | VVQRACRAI | 828 |
| A3270-67B | YAPPIRGQI | 430 |
| A3270-68B | YHRLRDLLL | 764 |
| A3270-69B | YTSLIYTLI | 634 |
